# Supplementary material for: From 3D hierarchical microspheres to 1D microneedles: the unique role of water in the morphology control of ferrocenylpyrrolidine C60 microcrystals
Source: Royal Society of Chemistry journal article supplement (doi:10.1039/d1nr00723h), 2021-01-01
Supplement: d1nr00723h1.pdf [file d1nr00723h1.pdf]

## Supporting Information

### From 3D Hierarchical Microspheres to 1D Microneedles: The Unique Role of Water in Morphology Control of Ferrocenylpyrrolidine C<sub>60</sub> Microcrystals

Zhiyao Peng, Mingming Su, Jintian Jiang, Guoming Ma, Ruiling Zhang, Ao Yu, Ping  
Peng\* and Fang-Fang Li\*

State Key Laboratory of Materials Processing and Die & Mould Technology, School of  
Materials Science and Engineering, Huazhong University of Science and Technology,  
Wuhan 430074, China

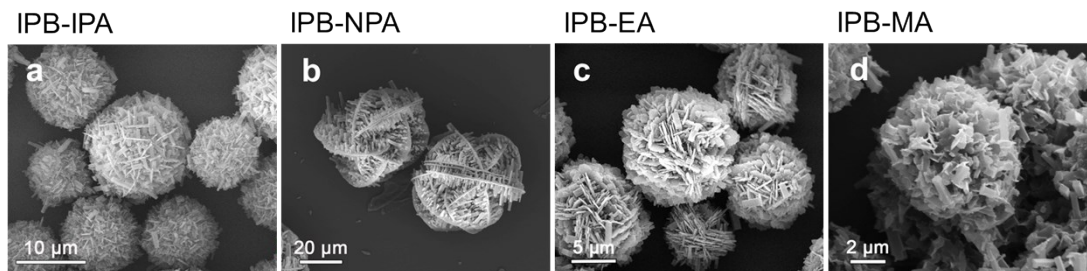

**Fig. S1** FESEM images of FC microstructures prepared by utilizing IPB as a good solvent and IPA (a) NPA (b), EA (c) and MA (d) as the corresponding poor solvents, respectively.

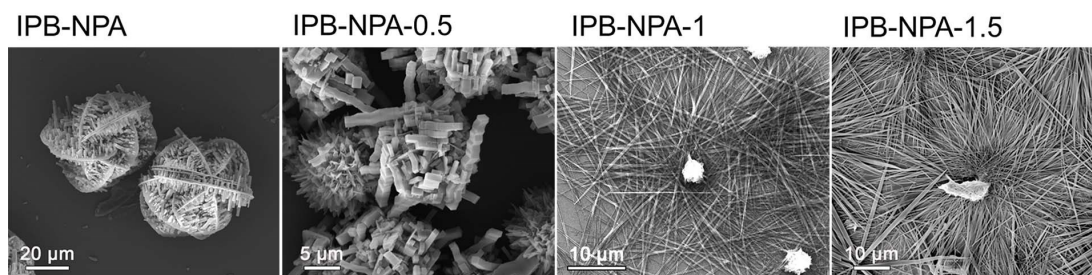

**Fig. S2** FESEM images of FC microstructures utilizing IPB as a good solvent, and the corresponding poor solvents are NPA, NPA-0.5mL H<sub>2</sub>O, NPA-1mL H<sub>2</sub>O, and NPA-1.5mL H<sub>2</sub>O, respectively.

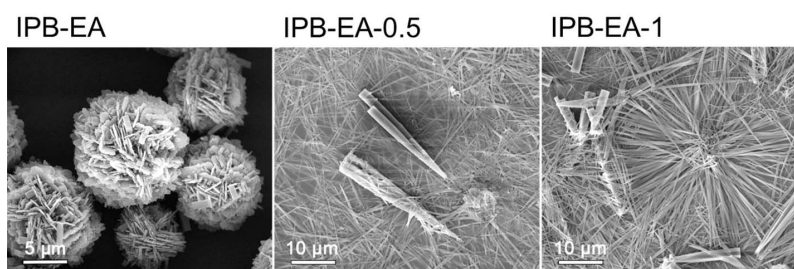

**Fig. S3** FESEM images of FC microstructures utilizing IPB as a good solvent, and EA, EA-0.5mL H<sub>2</sub>O and EA-1.5mL H<sub>2</sub>O as poor solvents, respectively.

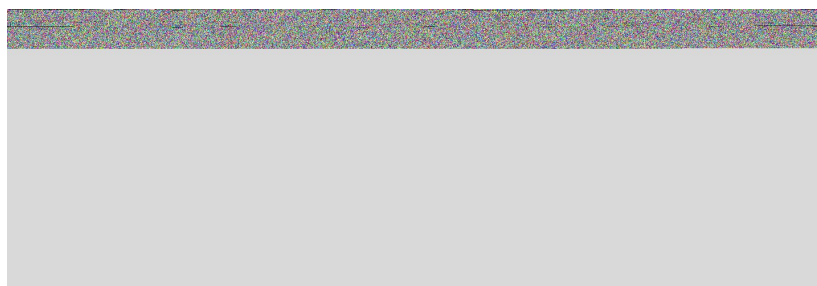

**Fig. S4** FESEM images of FC microstructures utilizing IPB as a good solvent, and the MA, MA-0.1mL H<sub>2</sub>O and MA-0.4mL H<sub>2</sub>O as good solvents, respectively.

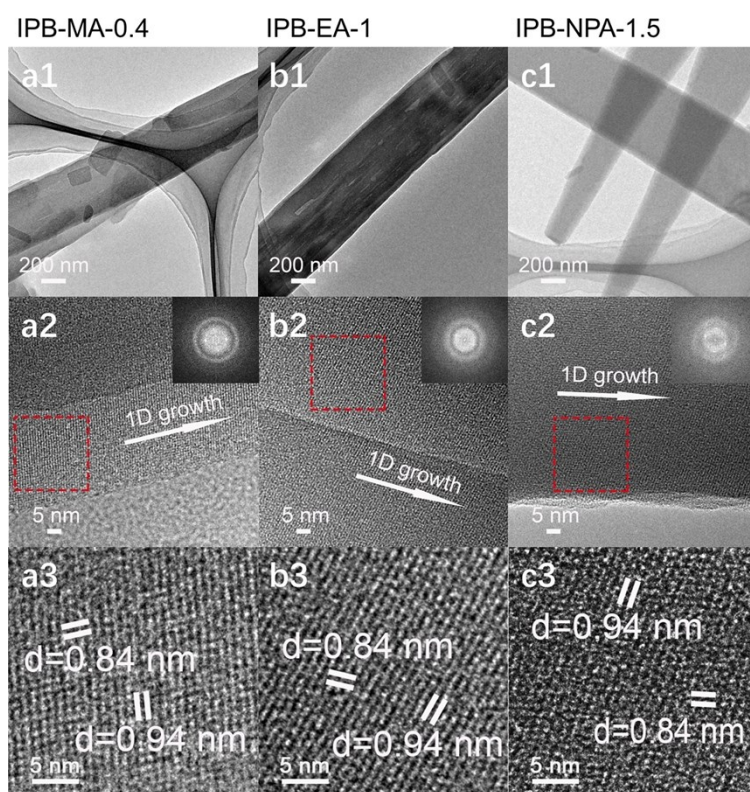

**Fig. S5** TEM and HRTEM images of IPB-MA-0.4 (a1-a2), IPB-EA-1 (b1-b2), and IPB-NPA-1.5 (c1-c2). HRTEM images of IPB-MA-0.4 (a3), IPB-EA-1 (b3), and IPB-NPA-1.5 (c3) corresponding to the dashed box from a2-c2.

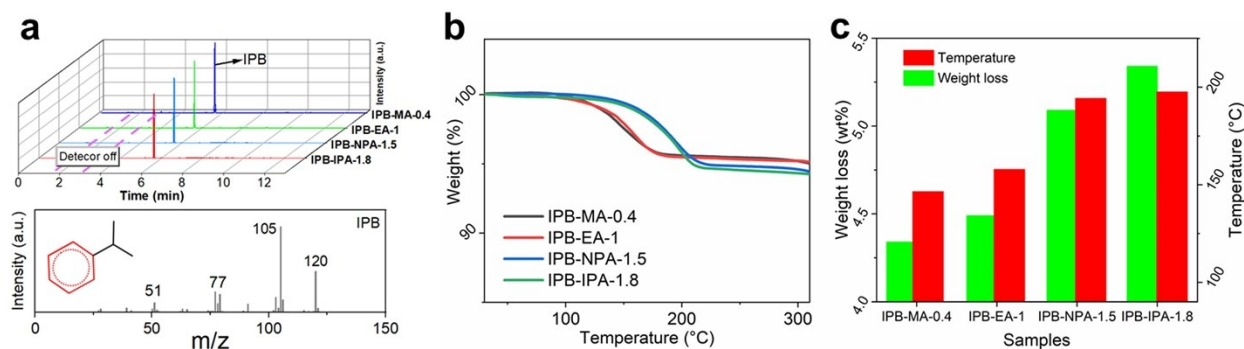

**Fig. S6** (a) GC-MS of IPB-MA-0.4, IPB-EA-1, IPB-NPA-1.5 and IPB-IPA-1.8 (The detector was off during the retention time between 1.8 and 3 min to avoid the over-strong chloroform peak) (b) TGA analysis at the heating rate of 5 °C/min and (c) the corresponding weight loss contents (wt%) and temperatures of IPB-MA-0.4, IPB-EA-1, IPB-NPA-1.5 and IPB-IPA-1.8.

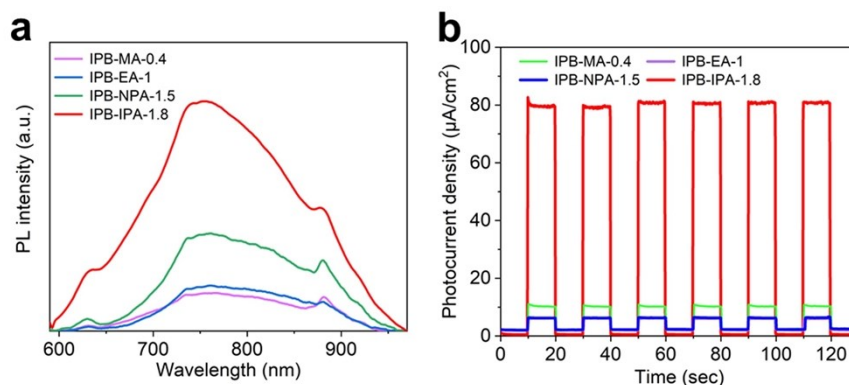

**Fig. S7** (a) Photoluminescence spectra and (b) photocurrent densities under full-band light irradiation of IPB-MA-0.4, IPB-EA-1, IPB-NPA-1.5, and IPB-IPA-1.8.

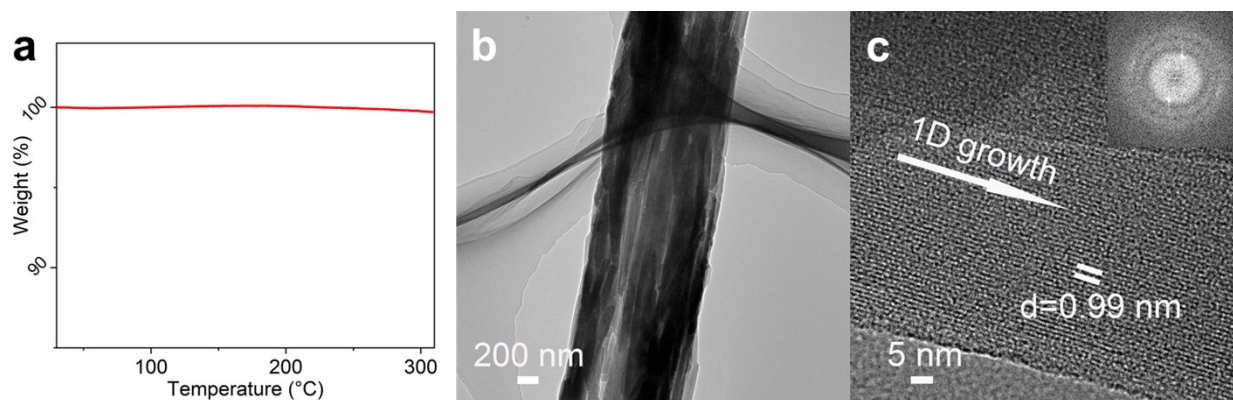

**Fig. S8** (a) TGA analysis at the heating rate of 5 °C/min, (b) TEM and (c) HRTEM images of IPB-IPA-1.8 after heating.
